# Supplementary material for: A Survey on the Oxidation Behavior of a Nickel-Based Alloy Used in Natural Gas Engine Exhaust Valve Seats
Source: MDPI journal article supplement (doi:10.3390/met13010049), 2022-12-24
Supplement: s1 [file s1]

## Article

# A Survey on the Oxidation Behavior of a Nickel-Based Alloy Used in Natural Gas Engine Exhaust Valve Seats

José Henrique Alano <sup>1,\*</sup>, Renato Luiz Siqueira <sup>2</sup>, Claudio Beserra Martins Júnior <sup>3</sup>, Rodrigo Silva <sup>3</sup>, Guilherme dos Santos Vacchi <sup>3</sup> and Carlos Alberto Della Rovere <sup>3,\*</sup>

<sup>1</sup> Engineering School, Federal University of Rio Grande, Avenida Itália, km 8—Bairro Carreiros, Rio Grande 96203-900, Brazil

<sup>2</sup> Latin American Institute of Technology, Infrastructure and Territory, Federal University of Latin American Integration, Avenida Tancredo Neves 6731, Foz do Iguaçu 85867-970, Brazil

<sup>3</sup> Munir Rachid Corrosion Laboratory, Department of Materials Engineering, Federal University of São Carlos, Rodovia Washington Luís, Km 235, São Carlos 13565-905, Brazil

\* Correspondence: henrique.al@gmail.com (J.H.A.); rovere@ufscar.br (C.A.D.R.); Tel.: +55-53-3237-3091 (J.H.A.); +55-16-3351-8525 (C.A.D.R.)

## Supplementary material

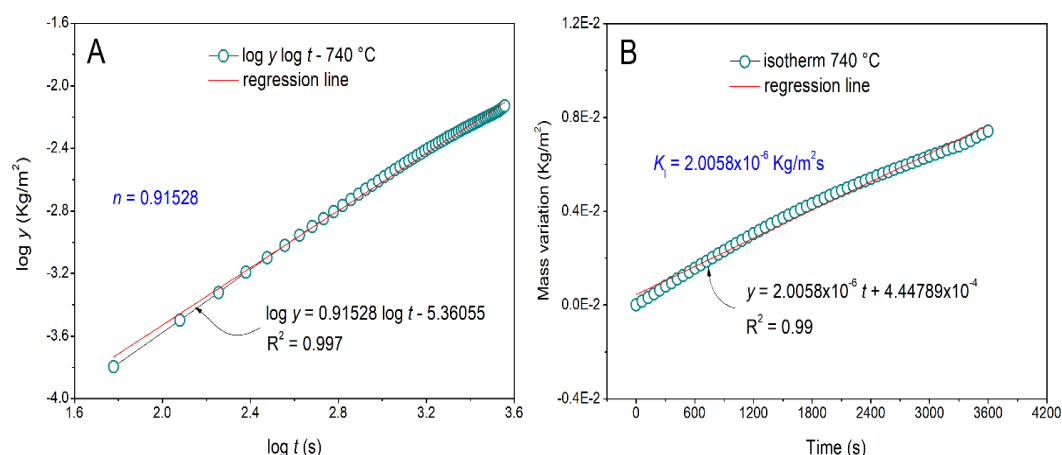

**Figure S1.** Mass variation per unit surface area as a function of the exposure time for the SV15 alloy at 740 °C: A)  $\log y$  versus  $\log t$  to determine the oxidation rate index ( $n$ ); and B)  $y$  versus  $t$  to determine the linear oxidation rate constant ( $K_1$ ).

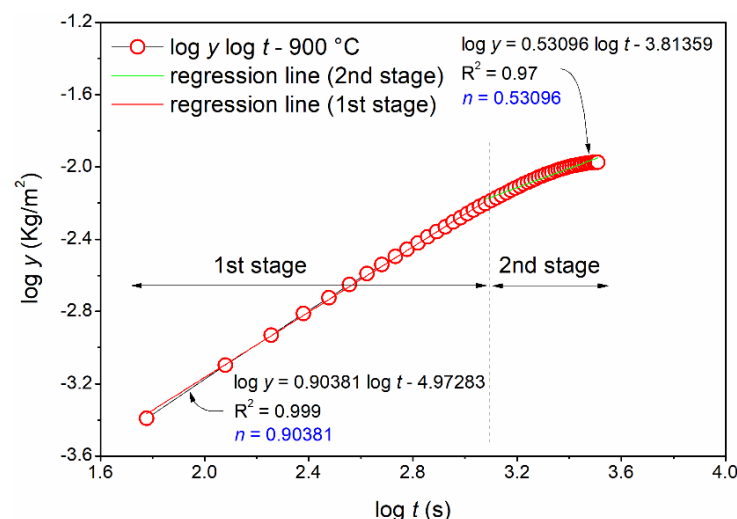

**Figure S2.** Regression lines two-stages at 900 °C.

**Citation:** Alano, J.H.; Siqueira, R.L.; Martins Júnior, C.B.; Silva, R.; Vacchi, G.d.S.; Rovere, C.A.D. A Survey on the Oxidation Behavior of a Nickel-Based Alloy Used in Natural Gas Engine Exhaust Valve Seats. *Metals* **2023**, *12*, 49.

<https://doi.org/10.3390/met13010049>

Academic Editor: Amir Mostafaei

Received: 28 October 2022

Revised: 14 December 2022

Accepted: 17 December 2022

Published: 24 December 2022

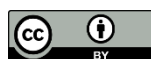

**Copyright:** © 2023 by the authors. Licensee MDPI, Basel, Switzerland. This article is an open access article distributed under the terms and conditions of the Creative Commons Attribution (CC BY) license (<https://creativecommons.org/licenses/by/4.0/>).

---

**Disclaimer/Publisher's Note:** The statements, opinions and data contained in all publications are solely those of the individual author(s) and contributor(s) and not of MDPI and/or the editor(s). MDPI and/or the editor(s) disclaim responsibility for any injury to people or property resulting from any ideas, methods, instructions or products referred to in the content.
